# Supplementary material for: Functional specialization of Piwi proteins in Paramecium tetraurelia from post-transcriptional gene silencing to genome remodelling
Source: PubMed Central journal article supplement — Nucleic Acids Res. 2011 Jan 7;39(10):4249–64. doi: 10.1093/nar/gkq1283 (PMC3105430; doi:10.1093/nar/gkq1283), 2011-01-07
Supplement: supp_gkq1283_SupFigS1.pdf [file supp_gkq1283_SupFigS1.pdf]

**Sup. Figure S1.** MUSCLE alignment of *P. tetraurelia* Ptiwi proteins with selected Argonaute proteins from other eukaryotes. Piwi, Ago, and Wago proteins are shaded in pink, blue, and green, respectively. The PAZ, MID and PIWI domains are indicated by coloured bars on top of the alignment, according to their annotation in other eukaryotic proteins (the PAZ domain in yellow, the MID domain in blue and the PIWI domain in red). Highly conserved residues are highlighted in these bars. At, *A. thaliana*; Dm, *D. melanogaster*; Ce, *C. elegans*; Mm, *M. musculus*; Pt, *P. tetraurelia*; Sp, *S. pombe*; Tt, *T. thermophila*.

Accession numbers :

| gene        | accession                       | gene       | accession                         | gene     | accession |
|-------------|---------------------------------|------------|-----------------------------------|----------|-----------|
| Ce-ZK757.3a | CAA82389                        | PTIWI02    | <a href="#">PTETG3700002001</a>   | At-AGO2  | NP_174413 |
| Ce-T22B3.2b | CAA92619                        | PTIWI03    | <a href="#">GSPATG00001395001</a> | At-AGO3  | NP_174414 |
| Ce-T23D8.7  | CAB03400                        | PTIWI04COR | <a href="#">PTETPS1700010001</a>  | At-AGO4  | NP_565633 |
| Ce-ALG-1    | NP_510322                       | PTIWI05    | <a href="#">GSPATG00038263001</a> | At-AGO5  | NP_850110 |
| Ce-ALG-2a   | AAB66187                        | PTIWI06    | <a href="#">GSPATG00002500001</a> | At-AGO6  | NP_180853 |
| Ce-ERGO-1   | NP_503362                       | PTIWI07    | <a href="#">PTETG2500007001</a>   | At-AGO7  | NP_177103 |
| Ce-RDE-1    | NP_741611                       | PTIWI08    | <a href="#">GSPATG00021288001</a> | At-AGO8  | NP_197602 |
| Ce-PRG-1    | NP_492121                       | PTIWI09    | <a href="#">GSPATG00020796001</a> | At-AGO9  | NP_197613 |
| Ce-PRG-2    | NP_500994                       | PTIWI10    | <a href="#">GSPATG00009468001</a> | At-AGO10 | NP_199194 |
| Ce-CSR-1a   | NP_001040938                    | PTIWI11    | <a href="#">GSPATG00019939001</a> | Mm-AGO1  | NP_700452 |
| Ce-C04F12.1 | NP_492573                       | PTIWI12    | <a href="#">GSPATG00001709001</a> | Mm-AGO2  | NP_694818 |
| Ce-SAGO-1   | NP_504610                       | PTIWI13    | <a href="#">PTETG4800007001</a>   | Mm-AGO3  | NP_700451 |
| Ce-SAGO-2   | NP_490758                       | PTIWI14    | <a href="#">PTETG16300003001</a>  | Mm-AGO4  | NP_694817 |
| Ce-PPW-1a   | NP_740835                       | PTIWI15    | <a href="#">GSPATG00005370001</a> | Mm-MIWI  | AAL31014  |
| Ce-F58G1.1  | NP_496751                       | Tt-TWI1    | XP_001018296                      | Mm-MIWI2 | AAN75583  |
| Ce-C06A1.4  | T18974                          | Tt-TWI2    | ABI17944                          | Mm-MILI  | BAA93706  |
| Ce-PPW-2    | AAF60414                        | Tt-4505902 | XP_001015193                      | Dm-AGO1A | NP_725341 |
| Ce-R06C7.1  | NP_492045                       | Tt-TWI7    | ABP68416                          | Dm-AGO2B | NP_648775 |
| Ce-F55A12.1 | AAB54129                        | Tt-TWI8    | ABI15747                          | Dm-PIWI  | NP_476875 |
| Ce-R04A9.2  | AAA83284                        | Tt-TWI9    | ABW36050                          | Dm-AUB   | NP_476734 |
| Ce-Y49F6A.1 | AAF60724                        | Tt-TWI10   | ABP68415                          | Dm-AGO3  | ABO27430  |
| Ce-C16C10.3 | CAA86741                        | Tt-TWI11   | ABW36051                          | Sp-AGO1  | NP_587782 |
| Ce-T22H9.3  | AAC69228                        | Tt-TWI12   | ABP68417                          |          |           |
| PTIWI01     | <a href="#">PTETG7100004001</a> | At-AGO1    | NP_849784                         |          |           |

|             |   |                                                                                                                                                       |
|-------------|---|-------------------------------------------------------------------------------------------------------------------------------------------------------|
| Dm-AGO3     | 1 |                                                                                                                                                       |
| Mm-MIWI     | 1 |                                                                                                                                                       |
| Mm-MIWI2    | 1 |                                                                                                                                                       |
| Mm-MILI     | 1 |                                                                                                                                                       |
| Dm-PIWI     | 1 |                                                                                                                                                       |
| Dm-AUB      | 1 |                                                                                                                                                       |
| Ce-PRG-1    | 1 |                                                                                                                                                       |
| Ce-PRG-2    | 1 |                                                                                                                                                       |
| Tt-TWI11    | 1 |                                                                                                                                                       |
| PTIWI12     | 1 |                                                                                                                                                       |
| PTIWI15     | 1 |                                                                                                                                                       |
| PTIWI03     | 1 |                                                                                                                                                       |
| PTIWI09     | 1 |                                                                                                                                                       |
| PTIWI01     | 1 |                                                                                                                                                       |
| PTIWI06     | 1 |                                                                                                                                                       |
| PTIWI10     | 1 |                                                                                                                                                       |
| PTIWI11     | 1 |                                                                                                                                                       |
| Tt-TWI1     | 1 |                                                                                                                                                       |
| Tt-TWI12    | 1 |                                                                                                                                                       |
| PTIWI07     | 1 |                                                                                                                                                       |
| Tt-TWI8     | 1 |                                                                                                                                                       |
| Tt-TWI9     | 1 |                                                                                                                                                       |
| Tt-TWI7     | 1 |                                                                                                                                                       |
| Tt-TWI2     | 1 |                                                                                                                                                       |
| Tt-4505902  | 1 |                                                                                                                                                       |
| Tt-TWI10    | 1 |                                                                                                                                                       |
| PTIWI02     | 1 |                                                                                                                                                       |
| PTIWI05     | 1 |                                                                                                                                                       |
| PTIWI04cor  | 1 |                                                                                                                                                       |
| PTIWI08     | 1 |                                                                                                                                                       |
| PTIWI14     | 1 |                                                                                                                                                       |
| PTIWI13     | 1 |                                                                                                                                                       |
| Sp-AGO1     | 1 |                                                                                                                                                       |
| At-AGO5     | 1 |                                                                                                                                                       |
| At-AGO1     | 1 |                                                                                                                                                       |
| At-AGO10    | 1 |                                                                                                                                                       |
| At-AGO7     | 1 |                                                                                                                                                       |
| At-AGO2     | 1 |                                                                                                                                                       |
| At-AGO3     | 1 |                                                                                                                                                       |
| At-AGO6     | 1 |                                                                                                                                                       |
| At-AGO4     | 1 |                                                                                                                                                       |
| At-AGO8     | 1 |                                                                                                                                                       |
| At-AGO9     | 1 |                                                                                                                                                       |
| Mm-AGO2     | 1 |                                                                                                                                                       |
| Mm-AGO1     | 1 |                                                                                                                                                       |
| Mm-AGO4     | 1 |                                                                                                                                                       |
| Mm-AGO3     | 1 |                                                                                                                                                       |
| Dm-AGO1A    | 1 |                                                                                                                                                       |
| Ce-ALG-1    | 1 |                                                                                                                                                       |
| Ce-ALG-2a   | 1 |                                                                                                                                                       |
| Ce-T23D8.7  | 1 |                                                                                                                                                       |
| Ce-ZK757.3a | 1 |                                                                                                                                                       |
| Ce-T22B3.2b | 1 |                                                                                                                                                       |
| Dm-AGO2B    | 1 | MGKKDKNKKGGQDSAAAPQPOQQQKQQQORQQQPQQLPQQLPQQLPQQPQQQQQQOPHQQQQSSRQPSTSSGGRASGFQQGGQQKSQDAEGWTAQKKQKQVQGWTKQGGQGGHQGGRQGGDGGYQQRPPGQQGGHQGGRQGGEGGYQQR |
| Ce-ERGO-1   | 1 |                                                                                                                                                       |
| Ce-RDE-1    | 1 |                                                                                                                                                       |
| Ce-R04A9.2  | 1 |                                                                                                                                                       |
| Ce-C16C10.3 | 1 |                                                                                                                                                       |
| Ce-T22H9.3  | 1 |                                                                                                                                                       |
| Ce-Y49F6A.1 | 1 |                                                                                                                                                       |
| Ce-C04F12.1 | 1 |                                                                                                                                                       |
| Ce-CSR-1a   | 1 |                                                                                                                                                       |
| Ce-R06C7.1  | 1 |                                                                                                                                                       |
| Ce-F55A12.1 | 1 |                                                                                                                                                       |
| Ce-PPW-2    | 1 |                                                                                                                                                       |
| Ce-F58G1.1  | 1 |                                                                                                                                                       |
| Ce-C06A1.4  | 1 |                                                                                                                                                       |
| Ce-SAGO-2   | 1 |                                                                                                                                                       |
| Ce-PPW-1a   | 1 |                                                                                                                                                       |
| Ce-SAGO-1   | 1 |                                                                                                                                                       |

MDRGGYRGGRGDGRGRGGGG







|             |     |              |         |      |                |           |              |            |         |          |          |        |          |       |         |        |           |        |          |       |        |       |          |       |               |        |          |         |         |     |         |     |        |     |   |     |       |   |
|-------------|-----|--------------|---------|------|----------------|-----------|--------------|------------|---------|----------|----------|--------|----------|-------|---------|--------|-----------|--------|----------|-------|--------|-------|----------|-------|---------------|--------|----------|---------|---------|-----|---------|-----|--------|-----|---|-----|-------|---|
| Dm-AGO3     | 202 | EDVELO       | RRLYK   | ---  | KKEEM          | ---       | RNCTO        | YNY        | FDRVM   | ---      | KVLNY    | ---    | VKFD     | ---   | KOFDPS  | ---    | RPK       | ---    | IIPLAK   | DEWPG | VTA    | ---   | D        | ---   | EYKGG         | M      |          |         |         |     |         |     |        |     |   |     |       |   |
| Mm-MIWI     | 188 | NGEHVR       | ITFLT   | ---  | NELPPTS        | ---       | PTCLO        | YNY        | FRLL    | ---      | KIMNL    | ---    | OO       | ---   | NYNPS   | ---    | DPI       | ---    | DIPNHR   | VWPG  | TTS    | ---   | L        | ---   | QYENN         | M      |          |         |         |     |         |     |        |     |   |     |       |   |
| Mm-MIWI2    | 176 | RGETIK       | ITFLT   | ---  | SKLFPNS        | ---       | PVCIC        | FPNY       | FRLL    | ---      | KNLSM    | ---    | YO       | ---   | NFKPS   | ---    | EPV       | ---    | EIPOYK   | QSWPG | AIS    | ---   | S        | ---   | HFESK         | L      |          |         |         |     |         |     |        |     |   |     |       |   |
| Mm-MILI     | 296 | DDAETS       | KTKOLT  | ---  | KILEPCS        | ---       | DLCCIP       | FPNY       | FRVM    | ---      | KLLDM    | ---    | KL       | ---   | NFDPT   | ---    | SAM       | ---    | VLQOHR   | QSWPG | AAS    | ---   | R        | ---   | RTDGG         | F      |          |         |         |     |         |     |        |     |   |     |       |   |
| Dm-PIWI     | 172 | LDIE         | KSTRFV  | ---  | GFISCAE        | ---       | PRFLO        | VNLL       | FRSM    | ---      | KGLNL    | ---    | EL       | ---   | NLDPR   | ---    | AKI       | ---    | EITREK   | QSWPG | ETS    | ---   | R        | ---   | QHEKD         | L      |          |         |         |     |         |     |        |     |   |     |       |   |
| Dm-AUB      | 190 | AGENIE       | KTRAV   | ---  | GSVQSTD        | ---       | AEQFO        | VNLL       | FRAM    | ---      | EGLDL    | ---    | KL       | ---   | YDPO    | ---    | AKI       | ---    | NLENFR   | QSWPG | OTS    | ---   | R        | ---   | QHEND         | L      |          |         |         |     |         |     |        |     |   |     |       |   |
| Ce-PRG-1    | 126 | PIDRSI       | CTRFK   | ---  | QTNRFVDD       | ---       | PQFIN        | FNT        | FRSF    | ---      | DALQL    | ---    | TO       | ---   | NENWG   | ---    | DSR       | ---    | AVPDYN   | SLPG  | META   | ---   | R        | ---   | MYEENFM       |        |          |         |         |     |         |     |        |     |   |     |       |   |
| Ce-PRG-2    | 66  | PNDNSI       | CTRFK   | ---  | KTNRFVDD       | ---       | PQFIN        | FNT        | FRSF    | ---      | DAMKL    | ---    | TO       | ---   | NEDWD   | ---    |           | ---    |          |       |        |       |          |       |               |        |          |         |         |     |         |     |        |     |   |     |       |   |
| Tt-TWI11    | 95  | ESFTQE       | TEFLV   | ---  | KKKDIVGQOLEEEN | ---       | KELO         | N          | FGMLNFQ | ---      | NNTKGF   | ---    | OO       | ---   | CA      | ---    | TKRAMN    | ---    | KNISN    | GEAVL | GVETFF | ---   | F        | ---   | SPOTGFO       |        |          |         |         |     |         |     |        |     |   |     |       |   |
| PTIWI12     | 86  | NEVONV       | TIRYI   | ---  | ESIDNG         | ---       | TKLOO        | IAK        | VQII    | ---      | STOQGM   | ---    | VO       | ---   | CA      | ---    | DKLWPK    | ---    | SFHEHFE  | TEWVO |        | ---   |          | ---   | IVQKQFG       |        |          |         |         |     |         |     |        |     |   |     |       |   |
| PTIWI15     | 86  | EEIQNAS      | KLV     | ---  | ESVDGG         | ---       | PKLOO        | IAK        | VQIM    | ---      | STOQGM   | ---    | VO       | ---   | CA      | ---    | DKLWPK    | ---    | SFHDYKFE | TEWVO |        | ---   |          | ---   | IVQKQFG       |        |          |         |         |     |         |     |        |     |   |     |       |   |
| PTIWI03     | 89  | EEAEQI       | WSTRFI  | ---  | NRLSENH        | ---       | ISKNO        | IAK        | VQV     | ---      | RNOFQM   | ---    | VS       | ---   | CA      | ---    | TGSKLWNS  | ---    | KQENN    | TEWV  | VECIY  | ---   | O        | ---   | PSAFQNF       |        |          |         |         |     |         |     |        |     |   |     |       |   |
| PTIWI09     | 84  | ETNODTAT     | KLV     | ---  | GKIENK         | ---       | ADLNI        | ISRF       | QVI     | ---      | RSOLOM   | ---    | VS       | ---   | CA      | ---    | NKGQKLWSS | ---    | QFKDN    | TEWV  | VECIF  | ---   | R        | ---   | PGEGGAQ       |        |          |         |         |     |         |     |        |     |   |     |       |   |
| PTIWI01     | 84  | ETNODTAT     | KLV     | ---  | GKIENK         | ---       | ADLNI        | ISRF       | QVI     | ---      | RSQMOM   | ---    | VS       | ---   | CA      | ---    | NKGQKLWSS | ---    | QFKDN    | TEWV  | VECIF  | ---   | R        | ---   | PGEGGAQ       |        |          |         |         |     |         |     |        |     |   |     |       |   |
| PTIWI06     | 87  | EGTS         | TSTBEK  | ---  | AVLKPGE        | ---       | PEYTG        | IGRFF      | MLL     | ---      | KOOKL    | ---    | LQ       | ---   | CA      | ---    | KENTK     | ---    | NPDF     | CHK   | LP     | VCS   | ---      | I     | ---           | IKQE   | IG       |         |         |     |         |     |        |     |   |     |       |   |
| PTIWI10     | 87  | EGTS         | TSTBEK  | ---  | AVLKPGE        | ---       | PEYTG        | IGRFF      | MLL     | ---      | KOOKL    | ---    | LQ       | ---   | CA      | ---    | KENTK     | ---    | NPDF     | CHK   | LP     | VCS   | ---      | I     | ---           | EEQKYY |          |         |         |     |         |     |        |     |   |     |       |   |
| PTIWI11     | 87  | EGTSHS       | TSTBEK  | ---  | AVLKPGE        | ---       | PEYTG        | IGRFF      | MLL     | ---      | KOOKL    | ---    | LQ       | ---   | CA      | ---    | KENTK     | ---    | NPDF     | CHK   | LP     | VCS   | ---      | I     | ---           | EEQKYY |          |         |         |     |         |     |        |     |   |     |       |   |
| Tt-TWI1     | 90  | TVDTKT       | SIRLL   | ---  | GEANNE         | ---       | REVQ         | V          | FRITVF  | ---      | AKIKL    | ---    | NK       | ---   | CA      | ---    | KEDPA     | ---    | EYNEV    | QVLS  | CHES   | ---   | E        | ---   | YSFNQKL       |        |          |         |         |     |         |     |        |     |   |     |       |   |
| Tt-TWI2     | 83  | SVLGO        | SITAOI  | ---  | QONGSPAF       | ---       | ITTN         | ---        | KEROL   | VNY      | ARBITF   | ---    | SKLNY    | ---   | HOYO    | ---    | GFNPI     | ---    | DPNNA    | ALS   | SKD    | ---   |          | ---   | EFRGKY        |        |          |         |         |     |         |     |        |     |   |     |       |   |
| PTIWI07     | 184 | NSDY         | YELAKV  | ---  | KVINQDL        | ENPN      | PIEA         | ---        | DKPLMF  | FNY      | TRDF     | ---    | KNLKY    | ---   | QEHG    | ---    | TRKHDIS   | ---    | PIPET    | NS    | IPG    | ---   | AVNF     | ---   | O             | ---    | TNEQGS   |         |         |     |         |     |        |     |   |     |       |   |
| Tt-TWI8     | 122 | KQTD         | YONRIT  | ---  | KVFRLEDL       | NNEN      | QRKS         | ---        | QPLLEF  | FNV      | NIL      | ---    | KGLNF    | ---   | FEFC    | ---    | NTK       | ---    | KIEGT    | NI    | YK     | ---   | NTFP     | ---   | E             | ---    | NCSDG    | L       |         |     |         |     |        |     |   |     |       |   |
| Tt-TWI9     | 125 | GEQS         | SIRTRFV | ---  | KQIEVONDE      | TVDQFSN   | ---          | NOINO      | N       | NTFDIL   | ---      | REENF  | ---      | IE    | ---     | CA     | ---       | NSKF   | ---      | NGYDI | QFO    | YK    | ---      | TFPO  | ---           | Y      | ---      | QTLKYQ  |         |     |         |     |        |     |   |     |       |   |
| Tt-TWI7     | 121 | DDOT         | SIRTRFT | ---  | KLPEVNEE       | SAQNKDKT  | TPNYKKG      | ---        | NKVTQ   | VNLL     | NII      | ---    | DOEGF    | ---   | KO      | ---    | CA        | ---    | QNTST    | TEWV  | CTFK   | ---   | V        | ---   | PTQOQY        |        |          |         |         |     |         |     |        |     |   |     |       |   |
| Tt-TWI2     | 123 | GOK          | SIRTRFT | ---  | KLPEVNEE       | SAQNLDKTS | PNFKKG       | ---        | NOVTO   | VNLL     | SIM      | ---    | RDEKF    | ---   | QE      | ---    | CA        | ---    | DGNTS    | TEWV  | KG     | ---   | TFNV     | ---   | T             | ---    | PTQDKY   |         |         |     |         |     |        |     |   |     |       |   |
| Tt-4505902  | 123 | DKQK         | SIRTRFT | ---  | KLPEVNEE       | SAQNLDKTS | PNFKKG       | ---        | NOVTO   | VNLL     | SIM      | ---    | RDEKF    | ---   | LE      | ---    | CA        | ---    | EGSTS    | TEWV  | KG     | ---   | TFNV     | ---   | T             | ---    | PTQDKY   |         |         |     |         |     |        |     |   |     |       |   |
| Tt-TWI10    | 108 | ENII         | CKTFYR  | ---  | REIELN         | LNTES     | NOINQNK      | TLQKKIS    | ---     | SLAIO    | S        | IAYSVY | ---      | KOFO  | ---     |        | ---       |        |          |       |        |       |          |       |               |        |          |         |         |     |         |     |        |     |   |     |       |   |
| PTIWI02     | 109 | QLSNIN       | LTRHV   | ---  | KTYNLT         | ONLDL     | IPH          | ---        | ESLKO   | ANAL     | SOIY     | ---    | QERNL    | ---   | KO      | ---    | FG        | ---    | IKKIND   | VO    | LOG    | ---   | TSV      | ---   | O             | ---    | MGQSSPL  |         |         |     |         |     |        |     |   |     |       |   |
| PTIWI05     | 108 | KEKKMI       | DIRYV   | ---  | KTINLK         | EMAQ      | FDQSSI       | ---        | NVTKO   | ANAL     | OLY      | ---    | ESRNMK   | ---   | ELFC    | ---    | GKFE      | ---    | LQKNY    | IGYM  | K      | ---   | RSAF     | ---   | C             | ---    | SGQSSPL  |         |         |     |         |     |        |     |   |     |       |   |
| PTIWI04cor  | 107 | DETKLI       | DIRYV   | ---  | KTINLK         | DLTQY     | NDQSSI       | ---        | NISKO   | ANAL     | QIH      | ---    | EKRNMKEF | ---   | FGK     | ---    |           | ---    | KQENF    | Q     | AYLK   | ---   | RNVY     | ---   | C             | ---    | PGQNTPL  |         |         |     |         |     |        |     |   |     |       |   |
| PTIWI08     | 104 | QELE         | VIAQHK  | ---  | KEYTL          | SDL       | SETTV        | ---        | NPVTO   | S        | INAVRSL  | ---    | KEMGM    | ---   | IE      | ---    | CA        | ---    | RINEH    | CHK   | VR     | ---   | GVKTSF   | ---   | O             | ---    | FYQGMPP  |         |         |     |         |     |        |     |   |     |       |   |
| PTIWI14     | 104 | OGEO         | VIAQHK  | ---  | KEYTL          | QDL       | SETTV        | ---        | NPVTO   | S        | INAVRSL  | ---    | REMGM    | ---   | IE      | ---    | CA        | ---    | RINEH    | CHK   | VR     | ---   | GVKTSF   | ---   | O             | ---    | MYQKPY   |         |         |     |         |     |        |     |   |     |       |   |
| PTIWI13     | 112 | DGKKHC       | YINFT   | ---  | KAIDFQ         | YLEG      | NDQPALM      | ---        | QPLQO   | AN       | QKAL     | ---    | KDMGL    | ---   | RE      | ---    | N         | ---    | PVKGF    | PK    | VL     | ---   | CKTS     | ---   | R             | ---    | LTSTKPO  |         |         |     |         |     |        |     |   |     |       |   |
| Sp-AGO1     | 107 | REIE         | YSKSSK  | ---  | INLHTL         | SQFVNS    | KYSSDPQV     | ---        | LSSIE   | D        | LLKPKP   | ---    | SETL     | ---   | FGFM    | ---    |           | ---    | VSLLG    | GEA   | K      | ---   | YOS      | ---   | R             | ---    | PNQGFMS  |         |         |     |         |     |        |     |   |     |       |   |
| At-AGO5     | 250 | KDRP         | KVIAKRV | ---  | TSTDLY         | QLOQ      | FLDRKQREAP   | ---        | YDPI    | VI       | DVLLDKP  | ---    | SNDY     | ---   | VS      | ---    | CA        | ---    | GELGD    | GEY   | R      | ---   | FO       | ---   | R             | ---    | LTQMG    | S       |         |     |         |     |        |     |   |     |       |   |
| At-AGO1     | 283 | RERE         | KVILKLV | ---  | ARADLH         | HGMFL     | EKGSDAP      | ---        | QEALO   | VNLL     | ELP      | ---    | TSRIRY   | ---   | IP      | ---    | CA        | ---    | OSLGD    | ES    | R      | ---   | YOS      | ---   | R             | ---    | PTQMG    | S       |         |     |         |     |        |     |   |     |       |   |
| At-AGO10    | 233 | RERS         | KVAIFRV | ---  | ARANMH         | HLEF      | LAKRADCP     | ---        | QEAVO   | LD       | VLLRSL   | ---    | VKRF     | ---   | CP      | ---    | CA        | ---    | QRLGE    | LES   | CC     | ---   | YOS      | ---   | R             | ---    | PTQMG    | S       |         |     |         |     |        |     |   |     |       |   |
| At-AGO7     | 263 | KK           | ---     | IEKL | R              | NKLV      | ---          | SKFDG      | KEQR    | KEGED    | WQALP    | ---    | PEYI     | HA    | DVLLRNP | ---    | MEKC      | ---    | TEIGG    | CAVGL | R      | ---   | FO       | ---   | R             | ---    | HTQOQ    | A       |         |     |         |     |        |     |   |     |       |   |
| At-AGO2     | 264 | RGRS         | TFITLQV | ---  | NVLK           | IGDL      | KEYMTGRSSFPN | ---        | RDVLO   | G        | DVVMKEHP | ---    | SKCM     | ---   | IT      | ---    | CA        | ---    | EDFRF    | Q     | IAAK   | ---   | RRH      | ---   | R             | ---    | PTAQGS   |         |         |     |         |     |        |     |   |     |       |   |
| At-AGO3     | 437 | RGRS         | TFITLQV | ---  | KELKLL         | DLQAY     | IDGRSTFIP    | ---        | RDVLO   | G        | DVVMKEHP | ---    | SKRM     | ---   | IT      | ---    | CA        | ---    | IDFY     | Q     | GAAK   | ---   | RRH      | ---   | R             | ---    | PTVQGS   |         |         |     |         |     |        |     |   |     |       |   |
| At-AGO6     | 144 | CKRSKRSF     | LPRS    | ---  | KVQHYA         | AEIPL     | KVTLVLTGRGAY | ---        | QDALR   | VNLL     | QQA      | ---    | AERGC    | ---   | LL      | ---    | RO        | ---    | MKVG     | GV    | IGIR   | ---   | GHSSF    | ---   | R             | ---    | PTHGGS   |         |         |     |         |     |        |     |   |     |       |   |
| At-AGO4     | 177 | DRKRLRRPNRSK | R       | ---  | ESYA           | ---       | AKIPLQ       | ALANAMRGQ  | ---     | QEAIR    | VNLL     | QQA    | ---      | ARQGC | ---     | LL     | ---       | RO     | ---      | EPVGN | L      | CC    | ---      | GHSSF | ---           | R      | ---      | TTQGG   | S       |     |         |     |        |     |   |     |       |   |
| At-AGO8     | 140 | OSKKN        | ALFLFA  | ---  | PPEIP          | MEAT      | ANALQKKT     | ---        | LDAIR   | VNLL     | QQA      | ---    | ARQGC    | ---   | LL      | ---    | RO        | ---    | ANIG     | E     | LVCC   | ---   | GHSSF    | ---   | R             | ---    | TTQGG    | S       |         |     |         |     |        |     |   |     |       |   |
| At-AGO9     | 155 | RSRRPN       | QTKK    | ---  | ESYA           | ---       | AKIPMQ       | ATASALQ    | ---     | QDALR    | VNLL     | QQA    | ---      | ARQGC | ---     | LL     | ---       | RO     | ---      | VP    | IGG    | V     | ---      | GHSSF | ---           | R      | ---      | TTQGG   | S       |     |         |     |        |     |   |     |       |   |
| Mm-AGO2     | 125 | KDRILK       | STRWV   | ---  | SCVSL          | QALH      | HDALSGRL     | ---        | FETIO   | A        | DVVMHLP  | ---    | SMRY     | ---   | TP      | ---    | CA        | ---    | NPLGG    | RE    | V      | ---   | GHOS     | ---   | R             | ---    | PSLWKM   |         |         |     |         |     |        |     |   |     |       |   |
| Mm-AGO1     | 122 | KDRILK       | STRWV   | ---  | AIVSW          | RML       | HEALVSGQ     | ---        | LESVO   | A        | DAMHLP   | ---    | SMRY     | ---   | TP      | ---    | CA        | ---    | HPLGG    | RE    | V      | ---   | GHOS     | ---   | R             | ---    | PAMWKM   |         |         |     |         |     |        |     |   |     |       |   |
| Mm-AGO4     | 114 | KDQT         | KVSRWV  | ---  | SVASL          | QQLLEA    | LAGHLEVP     | ---        | DDSVO   | A        | DITHLP   | ---    | SMRY     | ---   | TP      | ---    | CA        | ---    | HPLGG    | RE    | V      | ---   | GHOS     | ---   | R             | ---    | PAMWKM   |         |         |     |         |     |        |     |   |     |       |   |
| Mm-AGO3     | 117 | KDRILK       | STRWV   | ---  | SRVSW          | HLL       | HEALAGG      | ---        | TNPV    | H        | DVLLHLP  | ---    | SMRY     | ---   | TP      | ---    | CA        | ---    | HPLGG    | RE    | V      | ---   | GHOS     | ---   | R             | ---    | PAMWKM   |         |         |     |         |     |        |     |   |     |       |   |
| Dm-AGO1A    | 233 | KDRP         | KVIAKRV | ---  | AQVSL          | FNLEEA    | LEGRTRQIP    | ---        | YDAIA   | L        | DVVMHLP  | ---    | SMTY     | ---   | TP      | ---    | CA        | ---    | HPLGG    | RE    | V      | ---   | GHOS     | ---   | R             | ---    | PSQWK    | M       |         |     |         |     |        |     |   |     |       |   |
| Ce-ALG-1    | 237 | VERQ         | KVSRWV  | ---  | GOVSL          | TLED      | DAMEGRVQVP   | ---        | FEAVO   | S        | DVLLHLP  | ---    | SLKY     | ---   | TP      | ---    | CA        | ---    | SFFSPP   | V     | PNASG  | ---   | VMAGS    | ---   | CPQASGAVAGGAH | ---    | SAGY2HAE | ---     | SKLGG   | RE  | V       | --- | GHOS   | --- | R | --- | PSQWK | M |
| Ce-ALG-2a   | 163 | VERK         | SITKWI  | ---  | GOVCL          | SALD      | DAMEGRVQVP   | ---        | HEAVO   | S        | DVLLHLP  | ---    | SLKY     | ---   | TP      | ---    | CA        | ---    | SFFSPP   | V     | PNASG  | ---   | VMAGS    | ---   | CPQASGAVAGGAH | ---    | SAGY2HAE | ---     | SKLGG   | RE  | V       | --- | GHOS   | --- | R | --- | PSQWK | M |
| Ce-T23D8.7  | 168 | SPNL         | KVSRWV  | ---  | DSFL           | LDTKI     | TGNQDQNK     | ---        | LPMHA   | D        | TFQTS    | ---    | TGNF     | ---   | HA      | ---    | LQ        | ---    | SFSIA    | QNSA  | LEP    | ---   | SHGLGWGT | ---   |               | ---    | ETFTD    | T       |         |     |         |     |        |     |   |     |       |   |
| Ce-ZK757.3a | 195 | DRTRCA       | STONVGP | ---  | VLLM           | EMORT     | TRTNLDERV    | ---        | LTPIO   | D        | TFQSL    | ---    | TCPL     | ---   | LKNSA   | ---    | NF        | ---    | TWK      | ---   | SSCY   | ---   | RIP      | ---   | TAAGQA        | ---    |          | ---     | ASNYRPL |     |         |     |        |     |   |     |       |   |
| Ce-T22B3.2b | 193 | DRTRCA       | STONVGP | ---  | VLLM           | EMORT     | TRTNLDERV    | ---        | LTPIO   | D        | TFQSL    | ---    | TCPL     | ---   | LKNSA   | ---    | NF        | ---    | TWK      | ---   | SSCY   | ---   | RIP      | ---   | TAAGQA        | ---    |          | ---     | ASNYRPL |     |         |     |        |     |   |     |       |   |
| Dm-AGO2B    | 496 | RTLRL        | TEIKET  | ---  | GDST           | IDLK      | SLLTYM       | MNDRI      | ---     | FDPK     | ---      | ---    | ---      | ---   | ---     | ---    | ---       | ---    | ---      | ---   | ---    | ---   | ---      | ---   | ---           | ---    | ---      | ---     | MLGDRPF |     |         |     |        |     |   |     |       |   |
| Ce-ERGO-1   | 270 | NRRMNF       | VMYRV   | ---  | KQK            | FGGNI     | EDEETM       | ---        | QLLST   | DA       | ATORAR   | ---    | LPLAPPKY | ---   | TVFK    | ---    | LTLYL     | ---    | CEEA     | ---   | YEP    | ---   | LPVSLC   | ---   |               | ---    | NLRAG    | T       |         |     |         |     |        |     |   |     |       |   |
| Ce-RDE-1    | 153 | KKILY        | TITTYR  | ---  | KKFHL          | NFSREN    | PEKDEE       | ANRSYK     | ---     | LKNVMTQK | ---      | VRYAPE | ---      | NEEL  | ---     | VQF    | ---       | AKNFVY | ---      | DNNS  | ---    | LPVPS | ---      | EDHPN | ---           |        | ---      | LDFGEPV |         |     |         |     |        |     |   |     |       |   |
| Ce-R04A9.2  | 226 | SGST         | ERIRKTN | ---  | PPIY           | TRGPNAL   | TLENR        | ---        | SELTR   | EA       | TDQCL    | ---    | HNEKF    | ---   | LLYS    | ---    | GT        | ---    | PRL      | ---   | ASPD   | ---   | VTLK     | ---   | SVK           | ---    | TI       | ---     | VDRDG   | V   |         |     |        |     |   |     |       |   |
| Ce-C16C10.3 | 185 | KDSD         | LAVKPA  | ---  | GFVY           | TQGE      | VAQEEANR     | ---        | MELTR   | EA       | TSQKL    | ---    | NNEDY    | ---   | LQFN    | ---    | AT        | ---    | PRK      | ---   | SEPD   | ---   | AI       | ---   | RS            | ---    | AKVS     | ---     | IV      | --- | EGRNCKN |     |        |     |   |     |       |   |
| Ce-T22H9.3  | 184 | RKRD         | TYV     | ---  | KIR            | PSGF      | IYTS         | GEEASEVANR | ---     | MELTR    | EA       | TSQKL  | ---      | NNSDY | ---     | COFN   | ---       | DT     | ---      | SFR   | ---    | AO    | ---      | VP    | ---           |        | ---      | EGRNCKN |         |     |         |     |        |     |   |     |       |   |
| Ce-Y49F6A.1 | 137 | KNAE         | KVKS    | ---  | SPN            | G         | ---          | FVY        | ---     | TNGP     | NSLSDANR | ---    | OELPR    | ---   | VE      | ---    | ATSEVL    | ---    | NPEY     | ---   | LQFN   | ---   | OT       | ---   | AVN           | ---    |          | ---     | EPAV    |     |         |     |        |     |   |     |       |   |
| Ce-C04F12.1 | 203 | ASGK         | H       | ---  | S              | ELNS      | KOSELNT      | ---        | IDL     | NERL     | DSAA     | ---    | CPVTO    | ---   | AO      | ---    | ASAE      | ---    | KONG     | ---   | F      | ---   | I        | ---   | LDG           | ---    |          | ---     | ELDOK   |     |         |     |        |     |   |     |       |   |
| Ce-CSR-1a   | 283 | KDSIS        | SGDLE   | ---  | ISCEP          | DLEK      | SPFVQ        | TELNESD    | ---     | PREY     | A        | D      | ---      | TSOSA | ---     | IRSERY | ---       | LSQS   | ---      | GL    | ---    | VHT   | ---      | OSLE  | ---           |        | ---      | QSL     |         |     |         |     |        |     |   |     |       |   |
| Ce-R06C7.1  | 190 | DDLK         | TLPC    | ---  | SLEI           | YAPR      | NSITL        | SSENL      | ---     | GKRT     | ADQNI    | ---    | EVNN     | ---   | REYTO   | ---    | EA        | ---    | NOHC     | ---   | VRE    | ---   | TRKFRGC  | ---   | FEHC          | ---    | V        | ---     | FLNA    | --- | TEG     | --- | FDQRDC |     |   |     |       |   |
| Ce-F55A12.1 | 157 | DDLK         | TLPC    | ---  | SLEI           | YAPR      | NSITL        | SSENL      | ---     | GKRT     | ADQNI    | ---    | EVNN     | ---   | REYTO   | ---    | EA        | ---    | NOHC     |       |        |       |          |       |               |        |          |         |         |     |         |     |        |     |   |     |       |   |



PAZ domain, Hs-AGO1 residues involved in binding of sRNA 3' end (Ma et al 2004 Nature 429:318)

|             | R   | YR         | F       | Y                       | KY          | K                           | TYL        | Q         |          |             |                |                    |         |         |         |        |        |
|-------------|-----|------------|---------|-------------------------|-------------|-----------------------------|------------|-----------|----------|-------------|----------------|--------------------|---------|---------|---------|--------|--------|
| Dm-AGO3     | 327 | TYVIND     | CFDQN   | PTC                     | QFEI        | KTGCT                       | YVVE       | YYKQYHN   | NDV      | NOPLYSIK    | SR             | GIPAARENLO         | FCIPEL  | CVYT    | LRDEVRS | DNKL   |        |
| Mm-MIWI     | 316 | TYRVD      | DWDQN   | PKS                     | THKK        | ADGSE                       | SFLR       | YYRKOYNOE | TDL      | KOPVLSQP    | SR             | RGPGGTLPGP         | AMIPPEL | CVYT    | LTDMRN  | DFNV   |        |
| Mm-MIWI2    | 304 | TYRVD      | DWSVK   | PTQ                     | AFQK        | RDGSE                       | YVVE       | YYKQYDIT  | SDL      | NOPLVSLR    | SR             | RNDNSEPM           | VHMPPEL | CVYT    | LSSQATS | DFRL   |        |
| Mm-MILI     | 423 | TYRVD      | DWNKT   | PKD                     | SEVM        | SDGKE                       | YVVE       | YYKQYDIT  | VDL      | DOPLIHRPSE  | SR             | QNNHGMLLQGE        | VIHPEL  | PLSE    | TIPEL   | MKK    | DFRA   |
| Dm-PIWI     | 298 | TYVIND     | DFGQT   | PKS                     | THSC        | KGRD                        | SFVE       | YYLTYNDR  | FDH      | NOPLISKND   | SR             | ALKTNASL           | VVIPEL  | LCRT    | LNAEMRS | NFOL   |        |
| Dm-AUB      | 316 | TYRVD      | DFQST   | PLC                     | KKKT        | NDGE                        | YVVE       | YYKRYNDR  | FDL      | KOPLVMSRPTD | SR             | NIRGGDOA           | IMIPPEL | ARAT    | LMDAMRA | DFRT   |        |
| Ce-PRG-1    | 258 | LHFYTR     | DYSIS   | PLS                     | BEVK        | DGOS                        | TKKE       | YKNOYDIE  | TVD      | DOPLISEG    | P              | QPGEPPOV           | SVIPEL  | CFPT    | LTDEMRR | DFKM   |        |
| Ce-PRG-2    | 156 | LHFYTR     | DNEIT   | PLS                     | KKOK        | DGEO                        | TKKE       | YKNOYDIE  | TDD      | DOPLISEG    | P              | QPGEPPOV           | SVIPEL  | CFPT    | LTDEMRR | DFKM   |        |
| Tt-TWI11    | 228 | LYLVNG     | AFDNL   | PNS                     | FHEM        | RDPESTGKKK                  | SFVO       | YYELVHNR  | FDN      | ROPLIVEK    | R              | QNKRANQEGKPOQETPKI | VIIPEL  | COMT    | IPDELQN | DFML   |        |
| PTIWI12     | 200 | FYKVDL     | ETGMS   | PKD                     | LBIT        | ENGQET                      | YVVE       | YYKQYVNLK | TD       | KOPLKTM     | I              | GKQEEKV            | IVIIPEL | COMT    | LNDSVKN | NFSV   |        |
| PTIWI15     | 200 | FYKVDL     | EIGMS   | PKD                     | LBIT        | ENGQET                      | YVVE       | YYKQYVNLK | NE       | KOPLKTTL    | I              | GKQEEKV            | IVIIPEL | COMT    | LSDSVKS | NFSV   |        |
| PTIWI03     | 214 | FYVDSG     | EIGMN   | PKS                     | THON        | QNGEAT                      | YVVE       | YYSTVYNOK | I        | PNOPLKAVTG  | SR             | KDESQKE            | IVIIPEL | COMT    | LTDEMRR | NFNA   |        |
| PTIWI09     | 207 | FYKVEA     | DVNLK   | PAS                     | THTN        | EKCEIT                      | YVVE       | YYEQYK    | KVDG     | NOPLRATV    | SR             | QDKTEKT            | IHIIPEL | COMT    | LTDAIRN | DFNA   |        |
| PTIWI01     | 207 | FYKVEA     | DVNLK   | PAS                     | THTN        | EKCEIT                      | YVVE       | YYEQYK    | KVDG     | NOPLRATV    | SR             | QDKTEKT            | IHIIPEL | COMT    | LTDAIRN | DFNA   |        |
| PTIWI06     | 206 | FYKYNK     | NREMN   | PKS                     | THEN        | QNGSKK                      | YVVE       | YYQDYK    | IAIDT    | TOPLVELE    | SR             | KKQEEKI            | IVIIPEL | COMT    | LS      | EMRN   | NFOT   |
| PTIWI10     | 206 | FYKYNK     | SREMN   | PKS                     | THEN        | LKGEK                       | YVVE       | YYQDYK    | IAIDV    | TOPLVELE    | SR             | KKQEEKI            | IVIIPEL | COMT    | LS      | EMRN   | NFOT   |
| PTIWI11     | 206 | FYKYNK     | SREMN   | PKS                     | THEN        | LKGEK                       | YVVE       | YYQDYK    | IAIDV    | TOPLVELE    | SR             | KKQEEKI            | IVIIPEL | COMT    | LS      | EMRN   | NFOT   |
| Tt-TWI1     | 210 | FYKVES     | EKDMT   | PND                     | AGED        | RGTKK                       | YVVE       | YYKQYVNLK | NDP      | NOPLVKVLEK  | SR             | KTKTPPT            | VIIPEL  | COMT    | LTDQRRN | DFNL   |        |
| Tt-TWI2     | 222 | LYVELE     | DFNMT   | PDS                     | KHVV        | KHVV                        | YVVE       | YYKQYVNLK | NDP      | NOPLVKVLEK  | SR             | KTKTPPT            | VIIPEL  | COMT    | LTDQRRN | DFNL   |        |
| PTIWI07     | 328 | LYVELE     | DFNMT   | PDS                     | KHVV        | KHVV                        | YVVE       | YYKQYVNLK | NDP      | NOPLVKVLEK  | SR             | KTKTPPT            | VIIPEL  | COMT    | LTDQRRN | DFNL   |        |
| PTIWI08     | 267 | LYVELE     | DFNMT   | PDS                     | KHVV        | KHVV                        | YVVE       | YYKQYVNLK | NDP      | NOPLVKVLEK  | SR             | KTKTPPT            | VIIPEL  | COMT    | LTDQRRN | DFNL   |        |
| Tt-TWI9     | 259 | ORVQTD     | DRTKT   | POS                     | QBLW        | NOTNNO                      | SFLR       | YYKYVY    | QHEI     | NOPLVST     | KR             | DPITKQYQK          | IVIIPEL | COMT    | LSSNEKR | S      |        |
| Tt-TWI7     | 260 | RTVHDR     | DYSKN   | PRS                     | THLY        | RKTNLO                      | YVVE       | YYKQYVNLK | TD       | NOPLVSK     | IY             | EADTNLKIQ          | IHIIPEL | COMT    | LNDSVKN | NKNA   |        |
| Tt-TWI2     | 263 | QTVLDR     | DGQKT   | PSS                     | THLN        | SKTNTQ                      | YVVE       | YYKQYVNLK | TD       | NOPLVSK     | IY             | EADTNLKIQ          | IHIIPEL | COMT    | LNDSVKN | NKNA   |        |
| Tt-4505902  | 264 | QTVLDR     | DDKKT   | PSS                     | THLN        | SKTNTQ                      | YVVE       | YYKQYVNLK | TD       | NOPLVSK     | IY             | EADTNLKIQ          | IHIIPEL | COMT    | LNDSVKN | NKNA   |        |
| Tt-TWI10    | 238 | QTVLDR     | DDKKT   | PSS                     | THLN        | SKTNTQ                      | YVVE       | YYKQYVNLK | TD       | NOPLVSK     | IY             | EADTNLKIQ          | IHIIPEL | COMT    | LNDSVKN | NKNA   |        |
| PTIWI02     | 240 | MYVHOR     | DYTKN   | PLS                     | THYC        | AKYKON                      | FQK        | YYKQYVNLK | IDL      | NOPLVFN     | KOSIQPIDQHIKYO | IVIIPEL            | COMT    | LTDQRRN | DFNL    |        |        |
| PTIWI05     | 251 | MYVHOR     | DFKSN   | PTC                     | KMES        | LDMV                        | YVVE       | YYKQYVNLK | TD       | NOPLVSK     | IY             | EADTNLKIQ          | IHIIPEL | COMT    | LNDSVKN | NKNA   |        |
| PTIWI04cor  | 243 | FYVLDG     | DFSKT   | POS                     | LMEN        | GKVI                        | YVVE       | YYKQYVNLK | TD       | NOPLVSK     | IY             | EADTNLKIQ          | IHIIPEL | COMT    | LNDSVKN | NKNA   |        |
| PTIWI08     | 238 | FYVLDG     | DFSKT   | POS                     | LMEN        | GKVI                        | YVVE       | YYKQYVNLK | TD       | NOPLVSK     | IY             | EADTNLKIQ          | IHIIPEL | COMT    | LNDSVKN | NKNA   |        |
| PTIWI14     | 238 | FYVLDG     | DFSKT   | POS                     | LMEN        | GKVI                        | YVVE       | YYKQYVNLK | TD       | NOPLVSK     | IY             | EADTNLKIQ          | IHIIPEL | COMT    | LNDSVKN | NKNA   |        |
| PTIWI13     | 250 | FYVLDG     | DFSKT   | POS                     | LMEN        | GKVI                        | YVVE       | YYKQYVNLK | TD       | NOPLVSK     | IY             | EADTNLKIQ          | IHIIPEL | COMT    | LNDSVKN | NKNA   |        |
| Sp-AGO1     | 259 | VYVSHG     | EGFSSKA | SDS                     | FVVR        | RLNGEER                     | SWVE       | YVLENNHR  | QYP      | NLPC        | LVKNG          | AMIPPEL            | CFEYV   | GVK     | GOYTA   | KLNSDQ |        |
| At-AGO5     | 404 | SAKISG     | SSLP    | REL                     | RFTL        | EDKSEK                      | TVVO       | YVLENNHR  | QYP      | NLPC        | LVKNG          | AMIPPEL            | CFEYV   | GVK     | GOYTA   | KLNSDQ |        |
| At-AGO1     | 435 | KYKISG     | TAVAT   | REL                     | THPV        | DERNTOK                     | SWVE       | YVLENNHR  | QYP      | NLPC        | LVKNG          | AMIPPEL            | CFEYV   | GVK     | GOYTA   | KLNSDQ |        |
| At-AGO10    | 383 | KYKISG     | TQPT    | REL                     | THPV        | DERNTOK                     | SWVE       | YVLENNHR  | QYP      | NLPC        | LVKNG          | AMIPPEL            | CFEYV   | GVK     | GOYTA   | KLNSDQ |        |
| At-AGO7     | 418 | ORVYTG     | TEBIT   | ENI                     | REKYV       | REKYV                       | RUMS       | YVLENNHR  | QYP      | NLPC        | LVKNG          | AMIPPEL            | CFEYV   | GVK     | GOYTA   | KLNSDQ |        |
| At-AGO2     | 409 | OKLTHG     | SMQNT   | KDI                     | KDDL        | IDQEGNEPPRKT                | SVVE       | YVLENNHR  | QYP      | NLPC        | LVKNG          | AMIPPEL            | CFEYV   | GVK     | GOYTA   | KLNSDQ |        |
| At-AGO3     | 583 | OKLTHG     | SKDDT   | KDI                     | KDDL        | IDQEGNEPPRKT                | SVVE       | YVLENNHR  | QYP      | NLPC        | LVKNG          | AMIPPEL            | CFEYV   | GVK     | GOYTA   | KLNSDQ |        |
| At-AGO6     | 297 | MEPTIG     | SSKPC   | NOQ                     | LFSM        | KIKGERE                     | VPIREI     | YVLENNHR  | QYP      | NLPC        | LVKNG          | AMIPPEL            | CFEYV   | GVK     | GOYTA   | KLNSDQ |        |
| At-AGO4     | 330 | QEVHTG     | SDKPC   | REQ                     | THEL        | KKRNPENGEFETTEV             | TVAD       | YVLENNHR  | QYP      | NLPC        | LVKNG          | AMIPPEL            | CFEYV   | GVK     | GOYTA   | KLNSDQ |        |
| At-AGO8     | 285 | QEVHTG     | SGLHC   | KDO                     | THW         | KKRNPENGEFETTEV             | TVAD       | YVLENNHR  | QYP      | NLPC        | LVKNG          | AMIPPEL            | CFEYV   | GVK     | GOYTA   | KLNSDQ |        |
| At-AGO9     | 305 | QEVHTG     | SEHSC   | KDO                     | THW         | KKRNPENGEFETTEV             | TVAD       | YVLENNHR  | QYP      | NLPC        | LVKNG          | AMIPPEL            | CFEYV   | GVK     | GOYTA   | KLNSDQ |        |
| Mm-AGO2     | 278 | KVRCN      | TRRPA   | SHO                     | THPL        | QVESGOT                     | ECVAAO     | YVLENNHR  | QYP      | NLPC        | LVKNG          | AMIPPEL            | CFEYV   | GVK     | GOYTA   | KLNSDQ |        |
| Mm-AGO1     | 275 | KVRCN      | TRRPA   | SHO                     | THPL        | QVESGOT                     | ECVAAO     | YVLENNHR  | QYP      | NLPC        | LVKNG          | AMIPPEL            | CFEYV   | GVK     | GOYTA   | KLNSDQ |        |
| Mm-AGO4     | 267 | KVRCN      | TRRPA   | SHO                     | THPL        | QVESGOT                     | ECVAAO     | YVLENNHR  | QYP      | NLPC        | LVKNG          | AMIPPEL            | CFEYV   | GVK     | GOYTA   | KLNSDQ |        |
| Mm-AGO3     | 278 | KVRCN      | TRRPA   | SHO                     | THPL        | QVESGOT                     | ECVAAO     | YVLENNHR  | QYP      | NLPC        | LVKNG          | AMIPPEL            | CFEYV   | GVK     | GOYTA   | KLNSDQ |        |
| Dm-AGO1A    | 386 | KVRCN      | TRRPA   | SHO                     | THPL        | QVESGOT                     | ECVAAO     | YVLENNHR  | QYP      | NLPC        | LVKNG          | AMIPPEL            | CFEYV   | GVK     | GOYTA   | KLNSDQ |        |
| Ce-ALG-1    | 420 | KVRCN      | TRRPA   | SHO                     | THPL        | QVESGOT                     | ECVAAO     | YVLENNHR  | QYP      | NLPC        | LVKNG          | AMIPPEL            | CFEYV   | GVK     | GOYTA   | KLNSDQ |        |
| Ce-ALG-2a   | 325 | KVRCN      | TRRPA   | SHO                     | THPL        | QVESGOT                     | ECVAAO     | YVLENNHR  | QYP      | NLPC        | LVKNG          | AMIPPEL            | CFEYV   | GVK     | GOYTA   | KLNSDQ |        |
| Ce-T23D8.7  | 331 | RVRARCTWKP | ENI     | SEHL                    | SETAGNQDSKP | SVVE                        | YVLENNHR   | QYP       | NLPC     | LVKNG       | AMIPPEL        | CFEYV              | GVK     | GOYTA   | KLNSDQ  |        |        |
| Ce-ZK757.3a | 417 | VYVNSI     | QLPAD   | KL                      | MBOG        | QGIDEGCR                    | VCVAD      | YVLENNHR  | QYP      | NLPC        | LVKNG          | AMIPPEL            | CFEYV   | GVK     | GOYTA   | KLNSDQ |        |
| Ce-T22B3.2b | 412 | VYVNSI     | QLPAD   | KL                      | MBOG        | QGIDEGCR                    | VCVAD      | YVLENNHR  | QYP      | NLPC        | LVKNG          | AMIPPEL            | CFEYV   | GVK     | GOYTA   | KLNSDQ |        |
| Dm-AGO2B    | 652 | VYVNSI     | SRAP    | SSE                     | THBEH       | DEH                         | TVAS       | YVLENNHR  | QYP      | NLPC        | LVKNG          | AMIPPEL            | CFEYV   | GVK     | GOYTA   | KLNSDQ |        |
| Ce-ERGO-1   | 459 | TIRNPG     | NFVFG   | GAPAD                   | RKYV        | TSDGVE                      | TVAD       | YVLENNHR  | QYP      | NLPC        | LVKNG          | AMIPPEL            | CFEYV   | GVK     | GOYTA   | KLNSDQ |        |
| Ce-RDE-1    | 347 | RHLTFLD    | CEENS   | L                       | VYVF        | TGKSDRCR                    | KKYV       | TVLFLK    | YVLENNHR | QYP         | NLPC           | LVKNG              | AMIPPEL | CFEYV   | GVK     | GOYTA  | KLNSDQ |
| Ce-R04A9.2  | 429 | RSIMDE     | HGTGA   | DSV                     | THEO        | KLPDGMK                     | LTS        | TVTE      | YVLENNHR | QYP         | NLPC           | LVKNG              | AMIPPEL | CFEYV   | GVK     | GOYTA  | KLNSDQ |
| Ce-C16C10.3 | 411 | NLIRSS     | AENNA   | ENT                     | THMM        | KDDKGERE                    | TVAE       | YVLENNHR  | QYP      | NLPC        | LVKNG          | AMIPPEL            | CFEYV   | GVK     | GOYTA   | KLNSDQ |        |
| Ce-T22H9.3  | 372 | NLIMSR     | AETNS   | ETT                     | KMTT        | NNGERE                      | TVAD       | YVLENNHR  | QYP      | NLPC        | LVKNG          | AMIPPEL            | CFEYV   | GVK     | GOYTA   | KLNSDQ |        |
| Ce-Y49F6A.1 | 300 | GDRGDRGNH  | DHNE    | DWDERKVKVEVERLLLEPRALGS | IADAL       | KLVESVHLSKDVNRRSRIKLNKGNDEQ | TVAD       | YVLENNHR  | QYP      | NLPC        | LVKNG          | AMIPPEL            | CFEYV   | GVK     | GOYTA   | KLNSDQ |        |
| Ce-C04F12.1 | 345 | QSIPTDG    | SNVP    | GEI                     | KLPDGTPL    | LDDCARVSGKPKSFFDASKPA       | QVNO       | YVLENNHR  | QYP      | NLPC        | LVKNG          | AMIPPEL            | CFEYV   | GVK     | GOYTA   | KLNSDQ |        |
| Ce-CSR-1a   | 441 | QVATNT     | TVSDV   | THNA                    | PKDP        | PKDP                        | ECVAAO     | YVLENNHR  | QYP      | NLPC        | LVKNG          | AMIPPEL            | CFEYV   | GVK     | GOYTA   | KLNSDQ |        |
| Ce-R06C7.1  | 365 | RHLRTEG    | FHESA   | TKT                     | RHEL        | PDGKTC                      | SHAE       | YVLENNHR  | QYP      | NLPC        | LVKNG          | AMIPPEL            | CFEYV   | GVK     | GOYTA   | KLNSDQ |        |
| Ce-F55A12.1 | 332 | RHLRTEG    | FHESA   | TKT                     | RHEL        | PDGKTC                      | SHAE       | YVLENNHR  | QYP      | NLPC        | LVKNG          | AMIPPEL            | CFEYV   | GVK     | GOYTA   | KLNSDQ |        |
| Ce-PPW-2    | 371 | RHLRTEG    | HHEGA   | ATA                     | TVAT        | EGGGTC                      | TVAT       | YVLENNHR  | QYP      | NLPC        | LVKNG          | AMIPPEL            | CFEYV   | GVK     | GOYTA   | KLNSDQ |        |
| Ce-F58G1.1  | 361 | RHLRTEG    | HHEGA   | RNA                     | RHEL        | NDGGSC                      | TVAAO      | YVLENNHR  | QYP      | NLPC        | LVKNG          | AMIPPEL            | CFEYV   | GVK     | GOYTA   | KLNSDQ |        |
| Ce-C06A1.4  | 335 | RHLRTEG    | HHEGA   | GNA                     | RHEL        | NDGGSC                      | TVAAO      | YVLENNHR  | QYP      | NLPC        | LVKNG          | AMIPPEL            | CFEYV   | GVK     | GOYTA   | KLNSDQ |        |
| Ce-SAGO-2   | 315 | RLGEDG     | VMKTR   | RHET                    | RHET        | SAKETCFE                    | VEKSTREFTN | TVDF      | YVLENNHR | QYP         | NLPC           | LVKNG              | AMIPPEL | CFEYV   | GVK     | GOYTA  | KLNSDQ |
| Ce-PPW-1a   | 341 | RLGEDG     | VMKTR   | RHET                    | RHET        | SAKETCFE                    | VEKSTREFTN | TVDF      | YVLENNHR | QYP         | NLPC           | LVKNG              | AMIPPEL | CFEYV   | GVK     | GOYTA  | KLNSDQ |
| Ce-SAGO-1   | 324 | PMIKDF     | GLSAK   | ET                      | THER        | DNKKT                       | SVFN       | YVLENNHR  | QYP      | NLPC        | LVKNG          | AMIPPEL            | CFEYV   | GVK     | GOYTA   | KLNSDQ |        |











PIWI domain (PIWI subdomain B) residues involved in slicer activity

H

|              |      |                              |                   |                    |           |         |     |               |                    |               |               |
|--------------|------|------------------------------|-------------------|--------------------|-----------|---------|-----|---------------|--------------------|---------------|---------------|
| Dm-AGO3      | 814  | Q-KLSYKLCRLVYNWAGTVR         | PACCMYAEK         | AYLIGQS            | ORD       |         |     | VAEA          | SEK                |               | FYL           |
| Mm-MIWI      | 809  | Q-RLTYKLCQVYVYNNWPGV         | RVPAPCOYAEK       | APFLVQS            | HRE       |         |     | PNLS          | SNR                |               | FYL           |
| Mm-MIWI2     | 795  | Q-RLTYKLCQVYVYNNWQGL         | SRVPAPCOYAEK      | TFLVAQS            | HKE       |         |     | PSLE          | ANN                |               | FYL           |
| Mm-MILI      | 918  | Q-RLTYKLCQVYVYNNWPGT         | RVPAPCKYAEK       | APFLSQI            | HHE       |         |     | PATQ          | CGN                |               | FYL           |
| Dm-PIWI      | 790  | Q-KLTYKLCQVYVYNNWGTTR        | VPVCOYAEK         | APFLVGTN           | HSI       |         |     | PQNA          | EKKF               |               | FYL           |
| Dm-AUB       | 813  | Q-MLTYKLCQVYVYNNWGTTR        | VPVCHYAEK         | APFLVAES           | NRA       |         |     | PSAG          | QNO                |               | FYL           |
| Ce-PRG-1     | 771  | HO-QLAFLKLCQVYVYNNWQGT       | RVPAPCOYAEK       | APFLTAQS           | HDD       |         |     | ANGC          | RDK                |               | FYL           |
| Ce-PRG-2     | 669  | HO-QLAFLKLCQVYVYNNWQGT       | RVPAPCOYAEK       | APFLTAQS           | HDD       |         |     | ANGY          | RDK                |               | FYL           |
| Tt-TWI11     | 735  | H-TLTYRSLVLYNFVGA            | KPSI              | KYAEQOQTKFMKNFENLN |           |         |     | KMDPOTLLS     | SQKMC              | DKNST         | FYL           |
| PTIWI12      | 702  | K-VLTYKLCQVYVYNNFAGP         | KPAPRYAEC         | CEFIGSRYORN        |           |         |     | DKDPFIPVEELV  | VKKGVI             |               | FYL           |
| PTIWI15      | 702  | K-VLTYKLCQVYVYNNFAGP         | KPAPRYAEC         | CEFIGSRYORN        |           |         |     | DKDPFVPVEELV  | VKKGVI             |               | FYL           |
| PTIWI03      | 720  | K-ILTYKLCQVYVYNNFVGS         | KPAPRYAEC         | CNFIGDNYDDR        |           |         |     | DOMKFLPQSDLI  | HQKVI              |               | FYL           |
| PTIWI09      | 713  | K-VLTYKLCQVYVYNNFVGS         | KPAPRYAEC         | CNFIGDNYDDR        |           |         |     | DOVKFLPLPDLV  | KQKVI              |               | FYL           |
| PTIWI01      | 713  | K-VLTYKLCQVYVYNNFVGS         | KPAPRYAEC         | CNFIGDNYDDR        |           |         |     | DOVKFLPLPDLV  | KQKVI              |               | FYL           |
| PTIWI06      | 711  | Q-ALAYKLCQVYVYNNFVGA         | KPAPRYAEC         | VCSNFIGDRFDDR      |           |         |     | KPOTLIRPN     | QILNORRS           |               | FYL           |
| PTIWI10      | 711  | Q-SLTYKLCQVYVYNNFVGA         | KPAPRYAEC         | VCSNFIGDRFDDR      |           |         |     | KPOSLIKPNP    | ILNORRS            |               | FYL           |
| PTIWI11      | 711  | Q-ALAYKLCQVYVYNNFVGA         | KPAPRYAEC         | VCSNFIGDRFDDR      |           |         |     | POSLIKPNP     | ILNORRS            |               | FYL           |
| Tt-TWI1      | 717  | Q-VLTYKLCQVYVYNNFVGA         | KTPSA             | RYAETSNFVGDRIYPRK  |           |         |     | NDDTLIOAHP    | KYDKFRS            |               | FYL           |
| Tt-TWI2      | 786  | HSLLDADFQ-DLVVNTVYVLYNYHTKTS | PACQNAEK          | AEFVKMF            | TPA       |         |     | GSQONTIDLS    | NLRV               | CSNYKL        | FYL           |
| PTIWI07      | 822  | Q-DFVYGCQVYVYNNWVGS          | KIPAL             | KNCQKIKFLVEI       | QTE       |         |     | PINK          | RSSF               |               | FYL           |
| Tt-TWI8      | 795  | Q-ELVYGCQVYVYNNWVGS          | KYPAO             | QYAKKAKMVGTF       | QEE       |         |     | VSEK          | FNSR               |               | FYL           |
| Tt-TWI9      | 748  | FW-QFTYQCNVYVYNNWQGS         | RVPAA             | KYAEKAKYVFDY       | QDD       |         |     | NFGD          | KKN                |               | FYL           |
| Tt-TWI7      | 754  | FW-QLTYQCNVYVYNNWQGP         | RVPAA             | KYAEKAKFTSET       | EGV       |         |     | ANNE          | INS                |               | FYL           |
| Tt-TWI2      | 752  | FW-QLTYQCNVYVYNNWQGP         | RVPAA             | KYAEKAKFVSDT       | QEA       |         |     | ANEN          | TNS                |               | FYL           |
| Tt-4505902   | 753  | FW-QLTYQCNVYVYNNWQGP         | RVPAA             | KYAEKAKFVSDT       | QEA       |         |     | ANEN          | TNS                |               | FYL           |
| Tt-TWI10     | 722  | HW-QFTYQCNVYVYNNWQGA         | KIPAO             | KYACKLKRKYV        | EID       |         |     | PSKD          | KQSF               |               | FYL           |
| PTIWI02      | 711  | FW-RFTYQCNVYVYNNWVGP         | KIPAC             | QNAETAVRVGEV       | QSD       |         |     | AHVS          | ESL                |               | FYL           |
| PTIWI05      | 721  | FW-KFTYQCNVYVYNNWCGP         | KIPAC             | QNAETAVRVGEV       | KTN       |         |     | ASYY          | ETK                |               | FYL           |
| PTIWI04cor   | 712  | FW-KFTYQCNVYVYNNWCGP         | KILAC             | QNAETAVRTGEV       | ODN       |         |     | ACSS          | ESK                |               | FYL           |
| PTIWI08      | 731  | FW-QLTYQCNVYVYNNWVGA         | RIPSC             | QYAEKAYLIGDTYOGN   |           |         |     | IHKR          | AHLO               |               | CC            |
| PTIWI14      | 731  | FW-QLTYQCNVYVYNNWVGA         | RIPSC             | QYAEKAYLIGDTYOGT   |           |         |     | LHKR          | AHLO               |               | CC            |
| PTIWI13      | 749  | FW-QLTYQCNVYVYNNWVGA         | KIPAC             | QYAEKAPFLVGDTPKA   |           |         |     | VHON          | QKOH               |               | FYL           |
| Sp-AGO1      | 760  | FO-TLTYNLCQVYVYNNWVSA        | SIVPP             | YVYALSNLARYQVTA    |           |         |     | DDTFVETSEASMD |                    | QEVKPLLALSSK  | KTKV          |
| At-AGO5      | 919  | Q-MLTNNLCQVYVYNNWVSA         | SIVPP             | YVYALSNLARYQVTA    | ESE       |         |     | MSDGGSSRSR    | SSSTTGVG           | QVISOPLPAIKDN | KEV           |
| At-AGO1      | 960  | Q-SLANNLCQVYVYNNWVSA         | SIVPP             | YVYALSNLARYQVTA    | EPE       |         |     | TSDSGSMASGSM  | ARGGGMAGRSTRGPNVNA | AVRPLPALKEN   | KRV           |
| At-AGO10     | 907  | Q-SLANNLCQVYVYNNWVSA         | SIVPP             | YVYALSNLARYQVTA    | EPEI      |         |     | MQDNGSPGKKN   | TKTTVG             | DVGVKPLPALKEN | KRV           |
| At-AGO7      | 911  | Q-RLTYNLCQVYVYNNWVSA         | SIVPP             | YVYALSNLARYQVTA    | ERS       |         |     | SESNGSMNPS    | SVSRVGP            | PKTIPLPKLSDN  | KNL           |
| At-AGO2      | 926  | Q-KLLEDCQVYVYNNWVSA          | SIVPP             | YVYALSNLARYQVTA    | ERS       |         |     | KQPRGASTS     | SAASLASSLSL        | TIEDKAI       | FKLHAE        |
| At-AGO3      | 1106 | Q-KLLEDCQVYVYNNWVSA          | SIVPP             | YVYALSNLARYQVTA    | ERS       |         |     | KQSRGASSSS    | ASVASSSSSVT        | MEDKEIF       | KVHAG         |
| At-AGO6      | 812  | Q-NLHNSLQVYVYNNWVSA          | SIVPP             | YVYALSNLARYQVTA    | KFE       |         |     | DMSETSSSHGGIT | TAGA               | VPVPPMPKLN    | TASS          |
| At-AGO4      | 846  | Q-ELVHSLQVYVYNNWVSA          | SIVPP             | YVYALSNLARYQVTA    | KFE       |         |     | ELSETSSSHGGIT | TPGA               | VPVPPMPQLNN   | STSS          |
| At-AGO8      | 772  | Q-ELVHSLQVYVYNNWVSA          | SIVPP             | YVYALSNLARYQVTA    | KFE       |         |     | DOSETSSSHGGIT | APGP               | ISVAQLPRL     | KDNANS        |
| At-AGO9      | 818  | Q-ELVHSLQVYVYNNWVSA          | SIVPP             | YVYALSNLARYQVTA    | KFE       |         |     | DMSETSSSHGGIT | APGP               | ISVAQLPRL     | KDNANS        |
| Mm-AGO2      | 780  | Q-ILTYOLCQVYVYNNWVSA         | SIVPP             | YVYALSNLARYQVTA    | VDK       |         |     | EHDSEAGSHT    | SGQSNGRDH          | QALAKAVQVH    | QDTLRT        |
| Mm-AGO1      | 777  | Q-ILTYOLCQVYVYNNWVSA         | SIVPP             | YVYALSNLARYQVTA    | VDK       |         |     | EHDSEAGSHT    | SGQSNGRDH          | QALAKAVQVH    | QDTLRT        |
| Mm-AGO4      | 781  | Q-LLTYOLCQVYVYNNWVSA         | SIVPP             | YVYALSNLARYQVTA    | VDK       |         |     | EHDSEAGSHV    | SGQSNGRDP          | QALAKAVQIH    | QDTHQT        |
| Mm-AGO3      | 780  | Q-LLTYOLCQVYVYNNWVSA         | SIVPP             | YVYALSNLARYQVTA    | VDK       |         |     | EHDSEAGSHV    | SGQSNGRDP          | QALAKAVQIH    | QDTHQT        |
| Dm-AGO1A     | 904  | Q-CLTYOLCQVYVYNNWVSA         | SIVPP             | YVYALSNLARYQVTA    | VEK       |         |     | EHDSEAGSHV    | SGQSNGRDP          | QALAKAVQIH    | QDTHQT        |
| Ce-ALG-1     | 922  | Q-CLTYOLCQVYVYNNWVSA         | SIVPP             | YVYALSNLARYQVTA    | VDR       |         |     | EHDSEAGSHV    | SGQSNGRDP          | QALAKAVQIH    | QDTHQT        |
| Ce-ALG-2a    | 828  | Q-CLTYOLCQVYVYNNWVSA         | SIVPP             | YVYALSNLARYQVTA    | VDR       |         |     | EHDSEAGSHV    | SGQSNGRDP          | QALAKAVQIH    | QDTHQT        |
| Ce-T23D8.7   | 843  | H-ELTYOLCQVYVYNNWVSA         | SIVPP             | YVYALSNLARYQVTA    | ADE       |         |     | NFDMERFRL     | CGIGRNDG           |               | ST            |
| Ce-ZK757.3a  | 927  | Q-SLTYGCHTYVYVYNNWVSA        | SIVPP             | YVYALSNLARYQVTA    | VEK       |         |     | SKTKGLADNND   | CDTNSRSSTLASLLNV   | RTGSGGKKS     | YAPSVDDES     |
| Ce-T22B3.2b  | 922  | Q-NLTYGCHTYVYVYNNWVSA        | SIVPP             | YVYALSNLARYQVTA    | VEK       |         |     | SKTKGLADNND   | CDTNSRSSTLASLLNV   | RTGSGGKKS     | YAPSVDDES     |
| Dm-AGO2B     | 1145 | Q-OLTYNLCQVYVYNNWVSA         | SIVPP             | YVYALSNLARYQVTA    | VEK       |         |     | SKTKGLADNND   | CDTNSRSSTLASLLNV   | RTGSGGKKS     | YAPSVDDES     |
| Ce-ERGO-1    | 1041 | FWPTVHATLTYNCRSITTA          | PAPVYALSNLARYQVTA | DKET               | DGI       |         |     | NTYKSVNNI     | YCDLESFGD          | LCEVKNKDM     | VNVEKLEG      |
| Ce-RDE-1     | 946  | Y-KTYGHALSARCRKPSI           | PVEHYALSNLARYQVTA | AKELYRTY           |           |         |     | REHYIGDYA     | QPRY               | RHEHEHFLQ     | TNVKYPG       |
| Ce-R04A9.2   | 962  | M-NLTYHFAAHQVSYAPP           | PNVSYAAQNK        | AKRGHNNYK          | THTKLVDMN |         |     | DYSYRI        | KEKHEEII           | SSEVDDIL      | LMRDFI        |
| Ce-C16C10.3  | 938  | M-HLTYFRAGHQSYPQPS           | PDVYAAEN          | AKRGHNNYK          | IHQRYVNL  |         |     | QAVENRI       | IKDHELIN           | EDMRELA       | AAIVDEMSVAMNG |
| Ce-T22H9.3   | 896  | IT-HLTYFRAGHQSYPQPS          | PDVYAAEN          | AKRGHNNYK          | IHQRYVNL  |         |     | QAVENRI       | IKDHELIN           | EDMRELA       | AAIVDEMSVAMNG |
| Ce-Y49F6A.1  | 872  | M-NLTYHFAAHQVSYAPP           | PNVSYAAQNK        | AKRGHNNYK          | THTKLVDMN |         |     | QAVENRI       | IKDHELIN           | EDMRELA       | AAIVDEMSVAMNG |
| Ce-C04F12.1  | 862  | Q-VQFTALCAHQKSNIT            | SPES              | YAADEYAKRG         | GADLQSY   |         |     | SKTIQATLTK    | YSDLN              | LEMDSKEL      | SGELVEDIT     |
| Ce-CSR-1a    | 957  | VA-KVCAVCSLHQLVNS            | PSP               | YVANEYAKRG         | RDLDWGER  |         |     | KLKHRDLPT     | TIDSTQ             | LDYEKITL      | ILCFQTS       |
| Ce-R06C7.1   | 867  | E-ELTFLCHHHQIVL              | STSP              | YVANEYAKRG         | RDLDWGER  |         |     | RFKNGEL       | PDDWE              |               | TLTQLSYSTL    |
| Ce-F55A1.2.1 | 814  | E-ELTFLCHHHQIVL              | STSP              | YVANEYAKRG         | RDLDWGER  |         |     | TTKGP         | IEAKES             | QGERL         | KELTKEIGYQTD  |
| Ce-PPW-2     | 895  | E-EFTFLCHHHQIVL              | STSP              | YVANEYAKRG         | RDLDWGER  |         |     | TVDGP         | IEAKES             | SHGERL        | KELTKEIGYQTD  |
| Ce-F58G1.1   | 885  | E-DLTYKLCQVYVYNNWVSA         | SIVPP             | YVANEYAKRG         | RDLDWGER  |         |     | INANE         | IPVTP              | GPESARL       | KKMTDGI       |
| Ce-C06A1.4   | 859  | E-DLTYKLCQVYVYNNWVSA         | SIVPP             | YVANEYAKRG         | RDLDWGER  |         |     | VALNNVP       | TVSG               | PEADRL        | KELTKSIC      |
| Ce-SAGO-2    | 809  | PLWH--E-QLTNDLCYD            | HQIVFHPV          | GPV                | YIADRY    | SORGAMV | AAN | QGP           | YNEGQ              | IDL           | ATNSAYGY      |
| Ce-PPW-1a    | 835  | PLWH--E-QLTNDLCYD            | HQIVFHPV          | GPV                | YIADRY    | SORGAMV | AAN | QGP           | YNEGQ              | IDL           | ATNSAYGY      |
| Ce-SAGO-1    | 808  | YE-RLTNELCYD                 | HQIVFHPV          | GPV                | YIADRY    | SORGAMV | ALK | KPI           | YTNG               | EFGV          | ATNEQLY       |
