# Supplementary material for: Functional specialization of Piwi proteins in Paramecium tetraurelia from post-transcriptional gene silencing to genome remodelling
Source: PubMed Central journal article supplement — Nucleic Acids Res. 2011 Jan 7;39(10):4249–64. doi: 10.1093/nar/gkq1283 (PMC3105430; doi:10.1093/nar/gkq1283), 2011-01-07
Supplement: supp_gkq1283_SupTables.pdf [file supp_gkq1283_SupTables.pdf]

**Sup. Table S1.** *Paramecium PTIWI* genes. **(A)** The table shows the accession numbers of *PTIWI* genes in ParameciumDB (<http://Paramecium.cgm.cnrs-gif.fr/>) (Arnaiz et al. 2007 *Nucleic Acids Res* **35** (Database issue): D439-444), the sizes of the genes, the numbers of introns, the sizes and positions (in gene models) of the fragments used for dsRNA production (also used as probes in Fig. 2), the sizes and positions (in gene models) of the fragments used as probes in Sup. Fig. S3 and Fig. 3), the sizes of the deduced proteins, and the positions of the PAZ, MID and PIWI domains. For the *PTIWI04* pseudogene, the protein data (marked with \*) are from the virtual protein that was created by correcting nonsense and frameshift mutations in the coding sequence, using the *PTIWI05* paralog. **(B)** The table describes Smith-Waterman (Smith, T.F. and Waterman, M.S. 1981 *J Mol Biol* **147**(1): 195-197) alignments of each dsRNA fragment (lines) to each of the entire gene models (columns). The upper number is the overall percentage of sequence identity, and the lower number is the maximum length of perfect identity.

## A

| gene              | accession                         | gene                 |                  |                                                |                                                | protein              |                           |                           |                            |
|-------------------|-----------------------------------|----------------------|------------------|------------------------------------------------|------------------------------------------------|----------------------|---------------------------|---------------------------|----------------------------|
|                   |                                   | size (bp)<br>ATG-TGA | intron<br>number | size (bp) and<br>position of<br>dsRNA fragment | size (bp) and<br>position of probe<br>fragment | protein<br>size (aa) | PAZ<br>domain<br>position | MID<br>domain<br>position | PIWI<br>domain<br>position |
| <i>PTIWI08</i>    | <a href="#">GSPATG00021288001</a> | 2430                 | 3                | 645 (269-913)                                  | 146 (1451-1596)                                | 784                  | 204-312                   | 320-531                   | 540-784                    |
| <i>PTIWI14</i>    | <a href="#">PTETG16300003001</a>  | 2428                 | 3                | 723 (285-1007)                                 | 145 (1454-1598)                                | 784                  | 204-312                   | 320-531                   | 540-784                    |
| <i>PTIWI13</i>    | <a href="#">PTETG4800007001</a>   | 2483                 | 3                | 683 (105-787)                                  | 200 (1101-1300)                                | 802                  | 217-324                   | 332-546                   | 545-802                    |
| <i>PTIWI04cor</i> | <a href="#">PTETPS1700010001</a>  | 2297                 | 0                | 614 (484-1097)                                 |                                                | 765*                 | 211-312*                  | 320-527*                  | 536-765*                   |
| <i>PTIWI05</i>    | <a href="#">GSPATG00038263001</a> | 2325                 | 0                | 532 (572-1103)                                 |                                                | 774                  | 213-321                   | 328-536                   | 545-774                    |
| <i>PTIWI02</i>    | <a href="#">PTETG3700002001</a>   | 2295                 | 0                | 586 (96-681)                                   |                                                | 764                  | 206-311                   | 318-526                   | 535-764                    |
| <i>PTIWI01</i>    | <a href="#">PTETG7100004001</a>   | 2397                 | 3                | 401 (41-441)                                   | 675 (1756-2430)                                | 774                  | 180-284                   | 291-525                   | 536-774                    |
| <i>PTIWI09</i>    | <a href="#">GSPATG00020796001</a> | 2398                 | 3                | 390 (50-439)                                   | 867 (1773-2639)                                | 774                  | 180-284                   | 291-525                   | 536-774                    |
| <i>PTIWI03</i>    | <a href="#">GSPATG00001395001</a> | 2417                 | 3                | 659 (179-837)                                  |                                                | 781                  | 186-290                   | 298-532                   | 543-781                    |
| <i>PTIWI12</i>    | <a href="#">GSPATG00001709001</a> | 2315                 | 1                | 588 (307-894)                                  | 146 (1032-1177)                                | 763                  | 173-276                   | 284-515                   | 526-763                    |
| <i>PTIWI15</i>    | <a href="#">GSPATG00005370001</a> | 2315                 | 1                | 620 (307-926)                                  | 146 (1032-1177)                                | 763                  | 173-276                   | 284-515                   | 526-763                    |
| <i>PTIWI10</i>    | <a href="#">GSPATG00009468001</a> | 2456                 | 5                | 403 (22-424)                                   |                                                | 781                  | 179-284                   | 291-514                   | 523-781                    |
| <i>PTIWI11</i>    | <a href="#">GSPATG00019939001</a> | 2456                 | 5                | 406 (23-438)                                   |                                                | 773                  | 179-284                   | 291-514                   | 523-773                    |
| <i>PTIWI06</i>    | <a href="#">GSPATG00002500001</a> | 2443                 | 5                | 686 (160-845)                                  |                                                | 773                  | 180-284                   | 291-514                   | 523-773                    |
| <i>PTIWI07</i>    | <a href="#">PTETG2500007001</a>   | 2807                 | 7                | 726 (139-864)                                  |                                                | 875                  | 285-407                   | 412-639                   | 648-875                    |

## B

| dsRNA \ gene | 01         | 02         | 03         | 04cor      | 05         | 06         | 07         | 08         | 09         | 10         | 11         | 12         | 13         | 14         | 15         |
|--------------|------------|------------|------------|------------|------------|------------|------------|------------|------------|------------|------------|------------|------------|------------|------------|
| 01           | <b>100</b> | 50.0       | 51.5       | 44.6       | 40.5       | 46.8       | 45.1       | 46.6       | 85.5       | 39.1       | 39.9       | 44.2       | 45.7       | 45.6       | 52.5       |
|              | <b>401</b> | 11         | 11         | 12         | 11         | 9          | 12         | 11         | 19         | 9          | 9          | 11         | 11         | 11         | 11         |
| 02           | 41.8       | <b>100</b> | 44.7       | 51.9       | 54.3       | 41.1       | 40.5       | 38.3       | 43.0       | 44.1       | 38.1       | 37.7       | 43.6       | 39.0       | 39.7       |
|              | 11         | <b>586</b> | 10         | 12         | 11         | 10         | 12         | 13         | 11         | 10         | 10         | 11         | 11         | 12         | 11         |
| 03           | 57.8       | 44.0       | <b>100</b> | 43.3       | 42.5       | 39.7       | 38.9       | 45.6       | 54.6       | 44.1       | 44.4       | 53.7       | 45.7       | 43.1       | 51.3       |
|              | 14         | 10         | <b>659</b> | 15         | 14         | 10         | 12         | 11         | 14         | 10         | 10         | 12         | 15         | 11         | 12         |
| 04           | 41.4       | 46.8       | 42.3       | <b>100</b> | 63.0       | 45.1       | 41.0       | 39.8       | 37.4       | 48.2       | 46.9       | 38.3       | 52.4       | 41.7       | 37.7       |
|              | 12         | 13         | 15         | <b>614</b> | 18         | 10         | 10         | 12         | 11         | 11         | 11         | 11         | 10         | 15         | 11         |
| 05           | 41.2       | 46.2       | 41.5       | 61.9       | <b>100</b> | 41.1       | 49.4       | 50.2       | 39.5       | 47.9       | 44.5       | 44.2       | 42.8       | 49.6       | 44.2       |
|              | 11         | 11         | 12         | 16         | <b>532</b> | 11         | 12         | 11         | 12         | 11         | 11         | 11         | 14         | 11         | 11         |
| 06           | 40.0       | 39.5       | 43.6       | 38.5       | 47.9       | <b>100</b> | 43.3       | 41.8       | 40.7       | 72.6       | 72.0       | 36.4       | 40.5       | 44.3       | 37.3       |
|              | 11         | 11         | 10         | 12         | 11         | <b>686</b> | 10         | 11         | 12         | 17         | 15         | 11         | 11         | 10         | 12         |
| 07           | 42.8       | 41.2       | 44.0       | 40.7       | 46.4       | 34.6       | <b>100</b> | 39.5       | 38.8       | 37.6       | 43.0       | 42.8       | 42.0       | 41.7       | 38.4       |
|              | 12         | 10         | 12         | 10         | 11         | 13         | <b>726</b> | 12         | 12         | 13         | 13         | 10         | 13         | 11         | 11         |
| 08           | 44.8       | 39.1       | 40.4       | 40.1       | 47.5       | 45.6       | 44.4       | <b>100</b> | 43.9       | 40.9       | 40.5       | 41.4       | 50.4       | 77.4       | 35.8       |
|              | 11         | 12         | 12         | 12         | 13         | 12         | 11         | <b>645</b> | 11         | 13         | 13         | 11         | 12         | 19         | 15         |
| 09           | 85.1       | 42.9       | 47.5       | 44.0       | 46.5       | 46.7       | 43.0       | 43.5       | <b>100</b> | 42.3       | 43.8       | 42.7       | 40.9       | 43.0       | 51.1       |
|              | 19         | 10         | 11         | 11         | 9          | 10         | 10         | 10         | <b>390</b> | 11         | 11         | 10         | 11         | 11         | 10         |
| 10           | 37.8       | 42.6       | 45.2       | 36.6       | 37.7       | 75.8       | 40.7       | 44.4       | 43.1       | <b>100</b> | 85.1       | 40.4       | 39.4       | 42.3       | 35.0       |
|              | 11         | 9          | 10         | 11         | 12         | 17         | 13         | 11         | 10         | <b>403</b> | 20         | 10         | 10         | 12         | 9          |
| 11           | 37.7       | 38.2       | 36.2       | 43.4       | 38.3       | 72.6       | 37.9       | 41.9       | 38.5       | 85.0       | <b>100</b> | 43.3       | 43.2       | 39.6       | 33.9       |
|              | 10         | 9          | 13         | 10         | 10         | 14         | 10         | 10         | 10         | 20         | <b>406</b> | 10         | 10         | 10         | 11         |
| 12           | 56.9       | 41.0       | 57.6       | 39.7       | 41.5       | 49.1       | 42.9       | 40.5       | 54.3       | 44.0       | 50.6       | <b>100</b> | 41.2       | 47.3       | 81.5       |
|              | 11         | 11         | 12         | 11         | 11         | 11         | 10         | 11         | 11         | 12         | 12         | <b>588</b> | 11         | 17         | 18         |
| 13           | 42.0       | 43.3       | 41.4       | 47.1       | 39.3       | 38.4       | 38.2       | 51.2       | 36.0       | 36.4       | 42.2       | 42.5       | <b>100</b> | 44.3       | 44.0       |
|              | 10         | 11         | 14         | 12         | 11         | 12         | 11         | 10         | 12         | 11         | 11         | 11         | <b>683</b> | 11         | 11         |
| 14           | 42.4       | 40.0       | 48.6       | 44.4       | 47.1       | 44.4       | 41.7       | 79.0       | 45.3       | 39.5       | 42.1       | 50.3       | 47.0       | <b>100</b> | 49.3       |
|              | 11         | 10         | 10         | 12         | 12         | 13         | 11         | 19         | 10         | 12         | 13         | 17         | 11         | <b>723</b> | 11         |
| 15           | 56.0       | 40.4       | 54.6       | 40.1       | 44.0       | 51.1       | 41.6       | 46.7       | 52.9       | 50.4       | 45.4       | 81.6       | 41.5       | 41.1       | <b>100</b> |
|              | 11         | 10         | 14         | 12         | 16         | 12         | 12         | 15         | 10         | 15         | 12         | 18         | 11         | 11         | <b>620</b> |

**Sup. Table S2.** Comparison of the expression levels of *PTIWI* genes, as determined by a NimbleGen microarray analysis using GEO series GSE18002, between the vegetative samples of the wild-type (*Klebsiella*-fed) and *ND7* dsRNA-fed cultures (GSM450430 and GSM450436). Data preprocessing was as described in Mat. & Meth. The significance of differences in expression levels was assessed by a Welch Two Sample t-test comparing the mean signal (across the six probes) of each *PTIWI* gene in the *ND7* dsRNA vs. wild-type conditions. Significant differences are highlighted in bold.

| gene                  | wild-type   | <i>ND7</i> dsRNA | P values      |
|-----------------------|-------------|------------------|---------------|
| <i>PTIWI01</i>        | 1222        | 1258             | 0,91          |
| <i>PTIWI02</i>        | 3550        | 3078             | 0,62          |
| <i>PTIWI03</i>        | 1039        | 971              | 0,80          |
| <i>PTIWI04</i>        | 482         | 582              | 0,59          |
| <b><i>PTIWI05</i></b> | <b>936</b>  | <b>4028</b>      | <b>1,4E-3</b> |
| <i>PTIWI06</i>        | 348         | 344              | 0,98          |
| <i>PTIWI07</i>        | 260         | 331              | 0,44          |
| <i>PTIWI08</i>        | 1089        | 1113             | 0,89          |
| <i>PTIWI09</i>        | 1395        | 2051             | 0,23          |
| <i>PTIWI10</i>        | 2342        | 2702             | 0,68          |
| <i>PTIWI11</i>        | 1626        | 1885             | 0,33          |
| <i>PTIWI12</i>        | 3009        | 2517             | 0,48          |
| <b><i>PTIWI13</i></b> | <b>5611</b> | <b>10747</b>     | <b>1,1E-3</b> |
| <i>PTIWI14</i>        | 4226        | 5999             | 0,31          |
| <i>PTIWI15</i>        | 1930        | 1726             | 0,61          |

**Sup. Table S3.** Cumulative number of divisions, over 3 days at 27°C, of 12 individual post-autogamous clones isolated from populations of autogamous cells silenced for the indicated *PTIWI* genes by dsRNA feeding. ++, too many cells to estimate division numbers. D, all cells were dead. The significance of differences in the proportions of dead clones at day 3 (compared to the ‘no silencing’ control) was assessed by a Chi square test. Significant P values are shown in bold.

| knockdowns             |    | <i>PTIWI01</i> |      |      | <i>PTIWI03</i> |      |      | <i>PTIWI09</i> |      |      | <i>PTIWI01-03</i> |      |      | <i>PTIWI01-09</i>        |      |      | <i>PTIWI03-09</i> |      |      | <i>PTIWI01-03-09</i>     |      |      | no silencing |      |      |      |      |      |
|------------------------|----|----------------|------|------|----------------|------|------|----------------|------|------|-------------------|------|------|--------------------------|------|------|-------------------|------|------|--------------------------|------|------|--------------|------|------|------|------|------|
| days                   |    | day1           | day2 | day3 | day1           | day2 | day3 | day1           | day2 | day3 | day1              | day2 | day3 | day1                     | day2 | day3 | day1              | day2 | day3 | day1                     | day2 | day3 | day1         | day2 | day3 | day1 | day2 | day3 |
| post-autogamous clones | 1  | 3-4            | ≥6   | ++   | 2-3            | ≥6   | ++   | 3-4            | ≥6   | ++   | 2-3               | ≥6   | ++   | 2-3                      | 3-4  | D    | 3                 | ≥6   | ++   | 2                        | 4-5  | ++   | 2-3          | ≥6   | ++   | 2-3  | ≥6   | ++   |
|                        | 2  | 3-4            | ≥6   | ++   | 3              | ≥6   | ++   | 3              | ≥6   | ++   | 2-3               | ≥6   | ++   | 2                        | 4    | D    | 3                 | ≥6   | ++   | 1                        | 4    | D    | 3-4          | ≥6   | ++   | 3-4  | ≥6   | ++   |
|                        | 3  | 3              | ≥6   | ++   | 3              | ≥6   | ++   | 3-4            | ≥6   | ++   | 2-3               | ≥6   | ++   | 2                        | 3-4  | D    | 2-3               | ≥6   | ++   | 2                        | 4-5  | D    | 2-3          | ≥6   | ++   | 2-3  | ≥6   | ++   |
|                        | 4  | 3              | ≥6   | ++   | 2-3            | ≥6   | ++   | 2-3            | ≥6   | ++   | 2-3               | ≥6   | ++   | 2-3                      | 4-5  | ++   | 3-4               | ≥6   | ++   | 2                        | 4-5  | D    | 3            | ≥6   | ++   | 3    | ≥6   | ++   |
|                        | 5  | 3              | ≥6   | ++   | 2-3            | ≥6   | ++   | 3              | ≥6   | ++   | 2-3               | ≥6   | ++   | 2-3                      | 3-4  | D    | 3                 | ≥6   | ++   | 2                        | 4-5  | ++   | 3            | ≥6   | ++   | 3    | ≥6   | ++   |
|                        | 6  | 2-3            | ≥6   | ++   | 3              | ≥6   | ++   | 2-3            | ≥6   | ++   | 3                 | ≥6   | ++   | 1                        | 3-4  | D    | 3                 | ≥6   | ++   | 1-2                      | 4-5  | D    | 2-3          | ≥6   | ++   | 2-3  | ≥6   | ++   |
|                        | 7  | 3              | ≥6   | ++   | 2-3            | ≥6   | ++   | 2-3            | ≥6   | ++   | 3                 | ≥6   | ++   | 2-3                      | 3-4  | D    | 3                 | ≥6   | ++   | 2                        | 3-4  | D    | 2-3          | ≥6   | ++   | 2-3  | ≥6   | ++   |
|                        | 8  | 3              | ≥6   | ++   | 2-3            | ≥6   | ++   | 2-3            | ≥6   | ++   | 3-4               | ≥6   | ++   | 1-2                      | 3-4  | +    | 2-3               | ≥6   | ++   | 2                        | 4-5  | ++   | 3            | ≥6   | ++   | 3    | ≥6   | ++   |
|                        | 9  | 3-4            | ≥6   | ++   | 3-4            | ≥6   | ++   | D              | D    | D    | 2-3               | ≥6   | ++   | 2                        | 3-4  | D    | 2-3               | ≥6   | ++   | 2                        | 3-4  | D    | 2-3          | ≥6   | ++   | 2-3  | ≥6   | ++   |
|                        | 10 | 3              | ≥6   | ++   | 2-3            | ≥6   | ++   | 2-3            | ≥6   | ++   | 2-3               | ≥6   | ++   | 2                        | 4    | +    | 2-3               | ≥6   | ++   | 2                        | 3-4  | D    | 3-4          | ≥6   | ++   | 3-4  | ≥6   | ++   |
|                        | 11 | 3              | ≥6   | ++   | 3              | ≥6   | ++   | 2-3            | ≥6   | ++   | 2-3               | ≥6   | ++   | 2                        | 4-5  | ++   | 3                 | ≥6   | ++   | 2                        | 3-4  | D    | 3            | ≥6   | ++   | 3    | ≥6   | ++   |
|                        | 12 | 3              | 2-3  | 3-4  | 3              | ≥6   | ++   | 2              | 3-4  | +    | 2-3               | ≥6   | ++   | 1                        | 2-3  | D    | 2-3               | ≥6   | ++   | 2                        | 3-4  | D    | 2-3          | ≥6   | ++   | 2-3  | ≥6   | ++   |
| clones dead at day 3   |    | 0/12           |      |      | 0/12           |      |      | 1/12           |      |      | 0/12              |      |      | 8/12                     |      |      | 0/12              |      |      | 9/12                     |      |      | 0/12         |      |      |      |      |      |
| P value                |    | NA             |      |      | NA             |      |      | >0.99          |      |      | NA                |      |      | <b>2x10<sup>-3</sup></b> |      |      | NA                |      |      | <b>7x10<sup>-4</sup></b> |      |      | NA           |      |      |      |      |      |
